# Supplementary material for: Visual disturbance from informational signage in architectural heritage environments: Evidence from perception-based analyses
Source: Research Square preprint supplement (doi:10.21203/rs.3.rs-8579629/v1), 2026-01-30
Supplement: Supplementary file 1 [file 0a8d1fbcfebb04c329d3aa30.docx]

**Table A.1.** Research green space: features and typo-logical analysis

| **Type** | **Site Name** | **Location and Construction Period** | **Key Features and Comparable World Heritage Garden** |
| --- | --- | --- | --- |
| Private garden | Humble Administrator’s Garden | Suzhou, A.D.1509 | One of China’s four great classical gardens and a UNESCO World Heritage site, with exquisite garden architecture from the early sixteenth century, comparable to Kinkaku-ji (Kyoto, Japan), a famous Japanese Zen temple garden integrating Zen Buddhist aesthetics with garden art. |
| He Garden | Yangzhou, A.D. 1862 | Known as the “First Garden of the Late Qing”, featuring attractions like the Rainbow Corridor and Horse Pavilion, built in 1862, comparable to the Palace of Versailles (Versailles, France), an exemplar of European royal garden architecture reflecting French monarchical history. |
| Public garden | Zhan Garden | Nanjing, A.D.1368 | A national historical site granted to Prince Xu Da as a palace in 1368, combining historical legacy with public park function, comparable to Hampton Court Palace (London, UK), a former royal palace whose gardens similarly serve heritage and recreation purposes. |
| Ming Xiaoling Mausoleum | Nanjing, A.D.1376 | A UNESCO World Heritage site built in 1376, it includes the main tomb complex of Ming Emperor Zhu Yuanzhang with numerous mausoleum structures and stone carvings, comparable to the Taj Mahal (Agra, India), a renowned mausoleum famous for its architecture and large visitor numbers. |
| Scenic area | Slender West Lake Scenic Area | Yangzhou, A.D.1662 | A lakeside scenic park with garden islets and historic buildings, significant as a Qing dynasty imperial tour site, comparable to the Venice Lagoon (Venice, Italy), an urban waterfront region characterized by water-based scenery and historic architecture, with both attracting many visitors. |
| Haohe Scenic Area | Nantong, A.D. 958 | The most completely preserved ancient city moat in China, featuring numerous historic relics and waterfront landscapes dating back to 958, comparable to the Oxford section of the River Thames (UK), an urban riverine area with many historic buildings, both serving as central cultural waterways with long histories. |


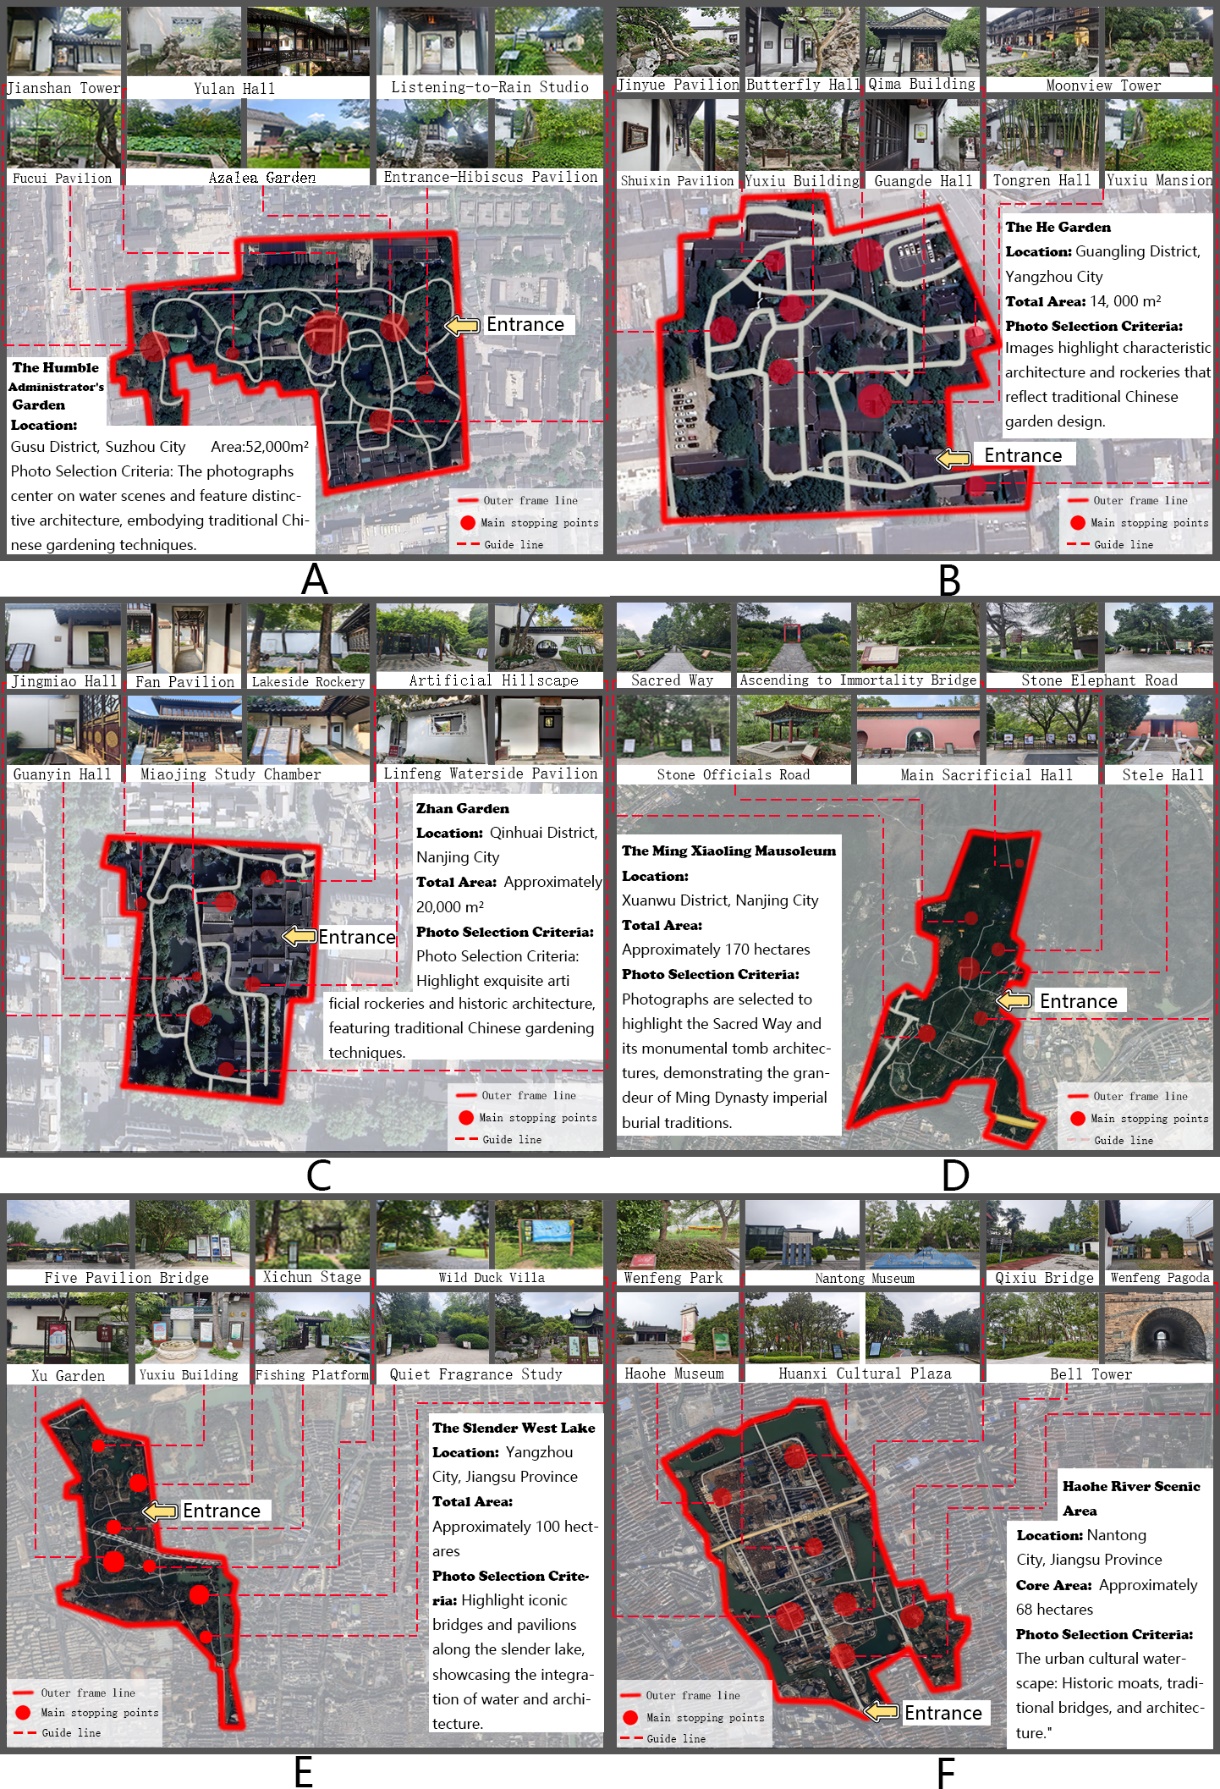


**Fig. A.1.** Survey route map. (*A: Humble Administrator’s Garden; B: He Garden; C: Zhan Garden; D: Ming Xiaoling Mausoleum Scenic Area; E: Slender West Lake Scenic Area; F: Hao River Scenic Area*)


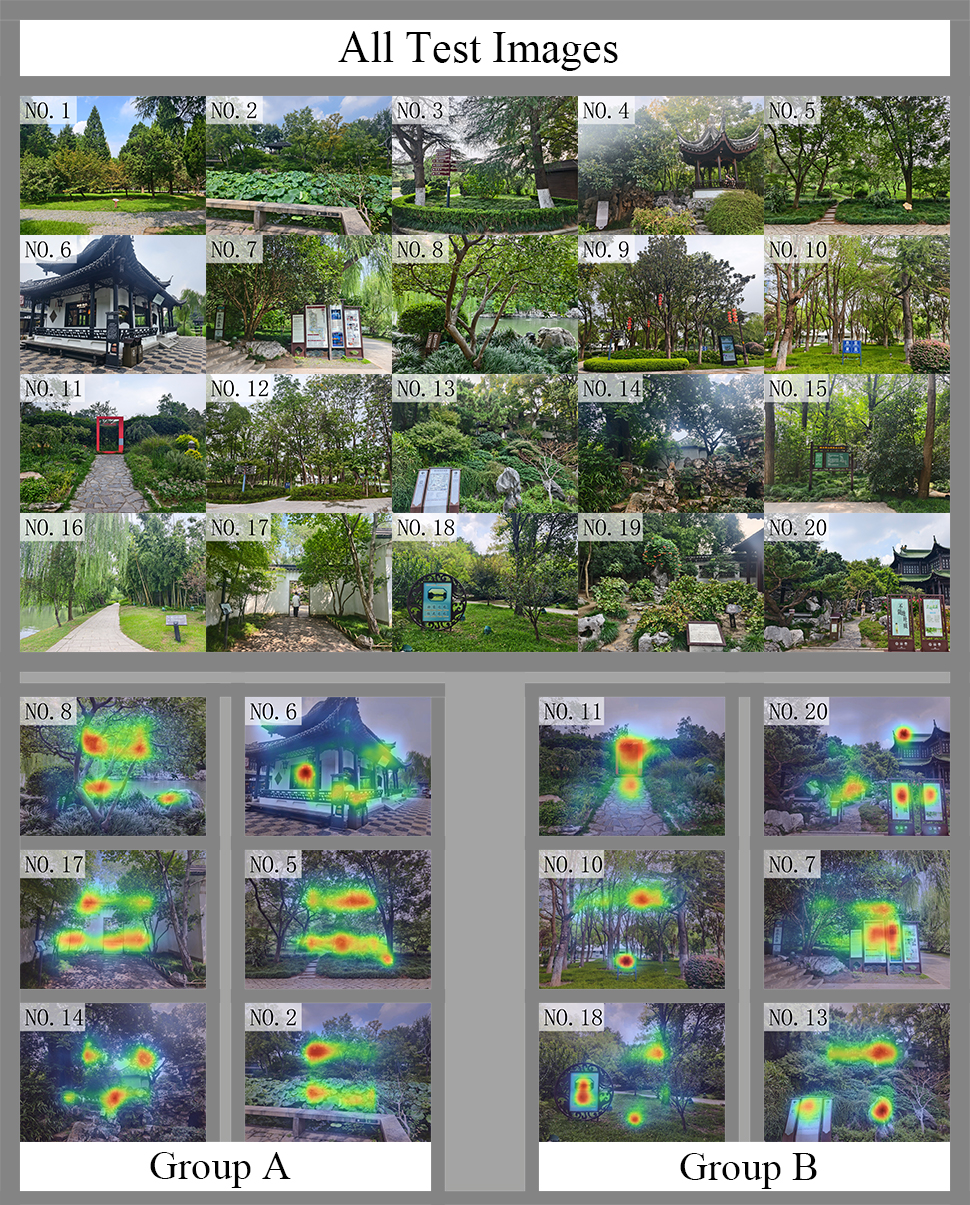


**Fig.A.2.** Eye tracking result analysis


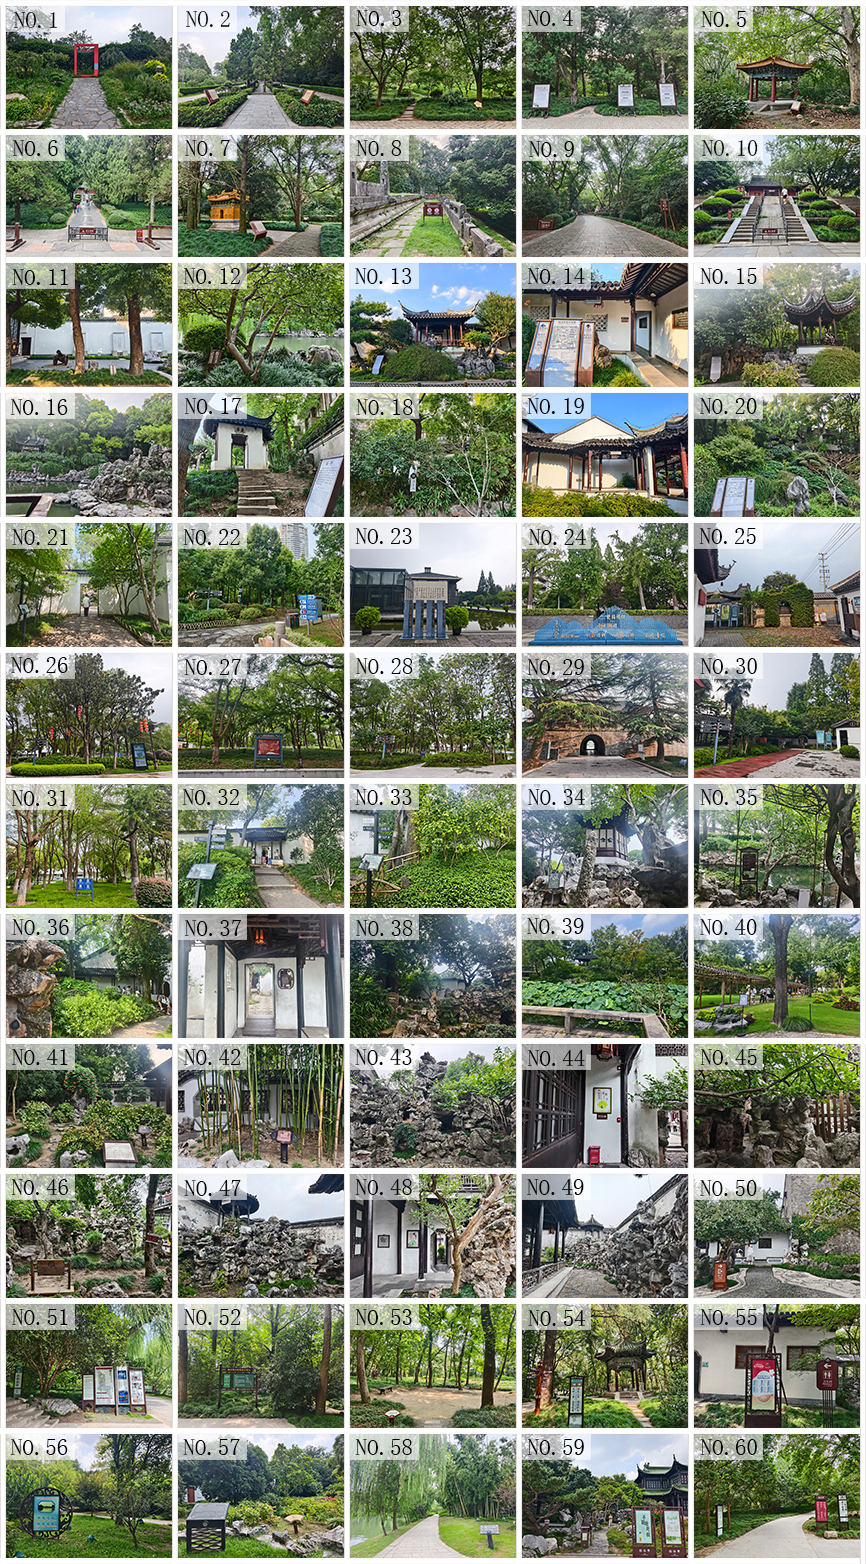


**Fig.A.3.** Image numbering

**Table A.2** Statistics of signage information

| **Serial Number** | **Type** | **Quantity** | **Area Proportion** | **Whether Entering Key Sight** | **Distance from Core Scenic Spots** | **Affiliated Park** |
| --- | --- | --- | --- | --- | --- | --- |
| 1 | Commercial Advertisements | 1 | 5% | Yes | 10 meters | Ming Xiaoling Mausoleum |
| 2 | Interpretive Panels | 2 | 3% | Yes | 10 meters |
| 3 | Warning Signs | 1 | 0.5% | No | 15 meters |
| 4 | Interpretive Panels | 3 | 4% | Yes | 5 meters |
| 5 | Interpretive Panels | 1 | 2% | No | 8 meters |
| 6 | Warning Signs | 2 | 1% | Yes | 3 meters |
| 7 | Interpretive Panels | 1 | 3% | Yes | 5 meters |
| 8 | Warning Signs | 1 | 2% | Yes | 2 meters |
| 9 | Guidance System | 2 | 1% | Yes | 50 meters |
| 10 | Warning Signs | 6 | 1% | Yes | 3 meters |
| 11 | Warning Signs | 2 | 0.5% | No | 5 meters | Zhan Garden |
| 12 | Warning Signs | 2 | 1% | No | 8 meters |
| 13 | Interpretive Panels | 1 | 2% | No | 3 meters |
| 14 | Interpretive Panels | 4 | 10% | Yes | 2 meters |
| 15 | Interpretive Panels | 1 | 3% | No | 2 meters |
| 16 | Warning Signs | 1 | 0.3% | No | 10 meters |
| 17 | Interpretive Panels | 1 | 4% | Yes | 1 meter |
| 18 | Guidance System | 1 | 1% | No | 15 meters |
| 19 | Guidance System | 1 | 0.5% | No | 5 meters |
| 20 | Interpretive Panels | 1 | 8% | Yes | 3 meters |
| 21 | Guidance System | 1 | 3% | Yes | 15 meters | Haohe Scenic Area |
| 22 | Warning Signs | 2 | 1.5% | Yes | 5 meters |
| 23 | Commercial Advertisements | 1 | 15% | Yes | 2 meters |
| 24 | Commercial Advertisements | 1 | 20% | Yes | 1 meter |
| 25 | Interpretive Panels | 6 | 3% | No | 3 meters |
| 26 | Guidance System | 2 | 4.5% | Yes | 8 meters |
| 27 | Commercial Advertisements | 1 | 5% | Yes | 10 meters |
| 28 | Guidance System | 1 | 1% | No | 6 meters |
| 29 | Interpretive Panels | 3 | 0.5% | No | 2 meters |
| 30 | Guidance System | 3 | 3.5% | Yes | 4 meters |
| 31 | Guidance System | 1 | 2.3% | No | 3 meters | Humble Administrator's Garden |
| 32 | Guidance System | 1 | 4.5% | Yes | 2 meters |
| 33 | Guidance System | 1 | 3.5% | Yes | 2 meters |
| 34 | Warning Signs | 1 | 1% | No | 1 meter |
| 35 | Guidance System | 1 | 6% | Yes | 5 meters |
| 36 | Warning Signs | 1 | 0.2% | No | 3 meters |
| 37 | Guidance System | 1 | 2% | No | 1 meter |
| 38 | Warning Signs | 1 | 0.3% | No | 4 meters |
| 39 | Warning Signs | 2 | 0.3% | No | 1 meter |
| 40 | Warning Signs | 1 | 1% | No | 8 meters |
| 41 | Interpretive Panels | 2 | 5% | Yes | 1 meter | He Garden |
| 42 | Warning Signs | 1 | 2% | Yes | 2 meters |
| 43 | Warning Signs | 1 | 0.3% | No | 1 meter |
| 44 | Warning Signs | 2 | 3.5% | Yes | 2 meters |
| 45 | Warning Signs | 1 | 0.2% | No | 1 meter |
| 46 | Warning Signs | 2 | 4% | Yes | 2 meters |
| 47 | Warning Signs | 1 | 1% | No | 3 meters |
| 48 | Warning Signs | 2 | 3% | No | 3 meters |
| 49 | Warning Signs | 1 | 0.2% | No | 1 meter |
| 50 | Guidance System | 1 | 5% | Yes | 5 meters |
| 51 | Interpretive Panels | 5 | 19% | Yes | 3 meters | Slender West Lake |
| 52 | Commercial Advertisements | 1 | 7% | Yes | 5 meters |
| 53 | Guidance System | 1 | 1% | Yes | 2 meters |
| 54 | Guidance System | 2 | 6.5% | Yes | 4 meters |
| 55 | Warning Signs | 2 | 11% | Yes | 2 meters |
| 56 | Warning Signs | 1 | 8% | Yes | 10 meters |
| 57 | Interpretive Panels | 2 | 7% | Yes | 1 meter |
| 58 | Guidance System | 1 | 1% | No | 5 meters |
| 59 | Warning Signs | 2 | 6% | Yes | 3 meters |
| 60 | Guidance System | 3 | 7% | Yes | 4 meters |
| Note: Signage dimensions were estimated after measurement with a tape measure, and distances were measured by pacing. | | | | | | |


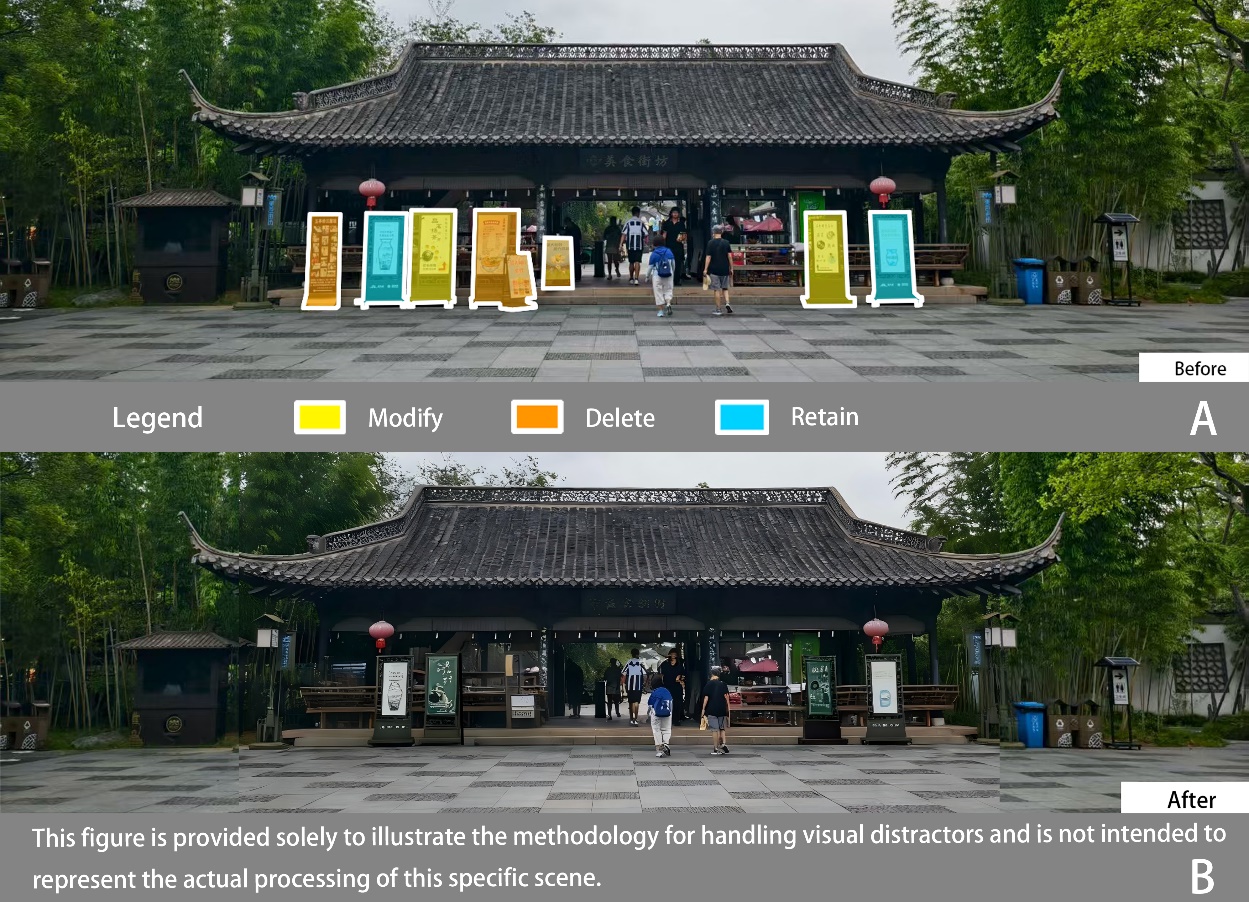


**Fig. A.4.** Legend Explanation (*A is the original image, B is the modified image.*)


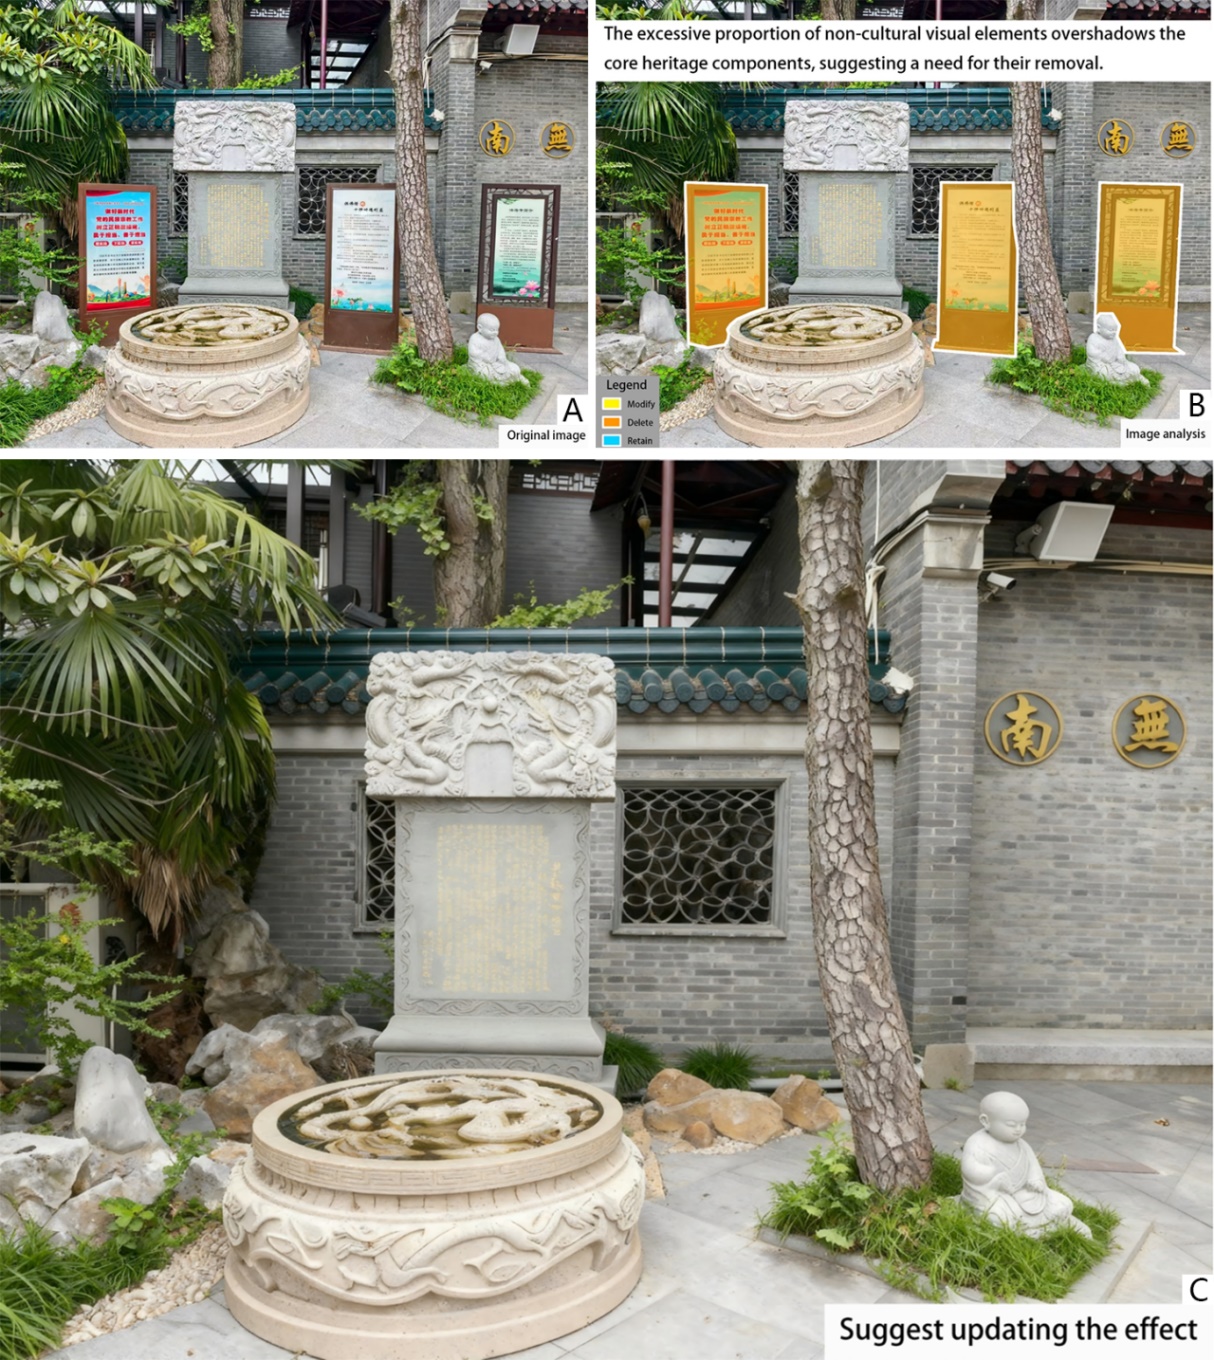


**Fig.A.5.** Analysis of the stele and surrounding non-cultural elements in the Slender West Lake Scenic Area *(A is the original image, B is the analysis image, C is the proposed effect image.*)


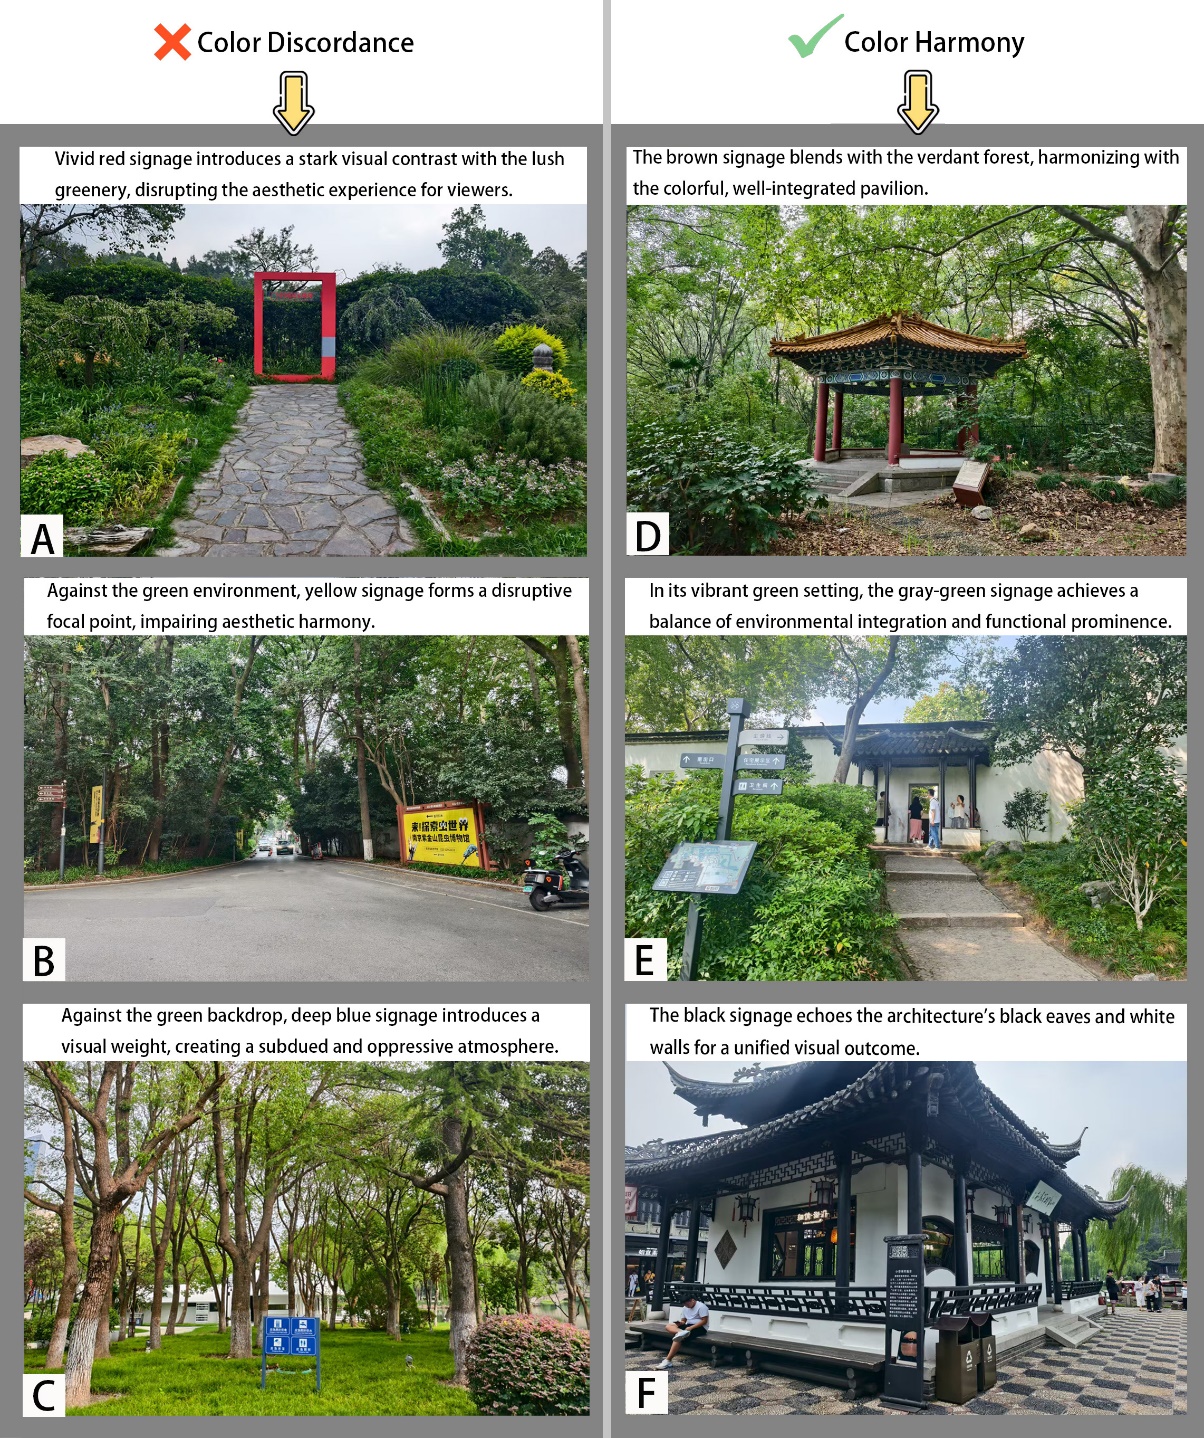


**Fig.A.6.** Diagram illustrating grouping by color harmony (*A–C show color disharmony, while D–F show color harmony.*)


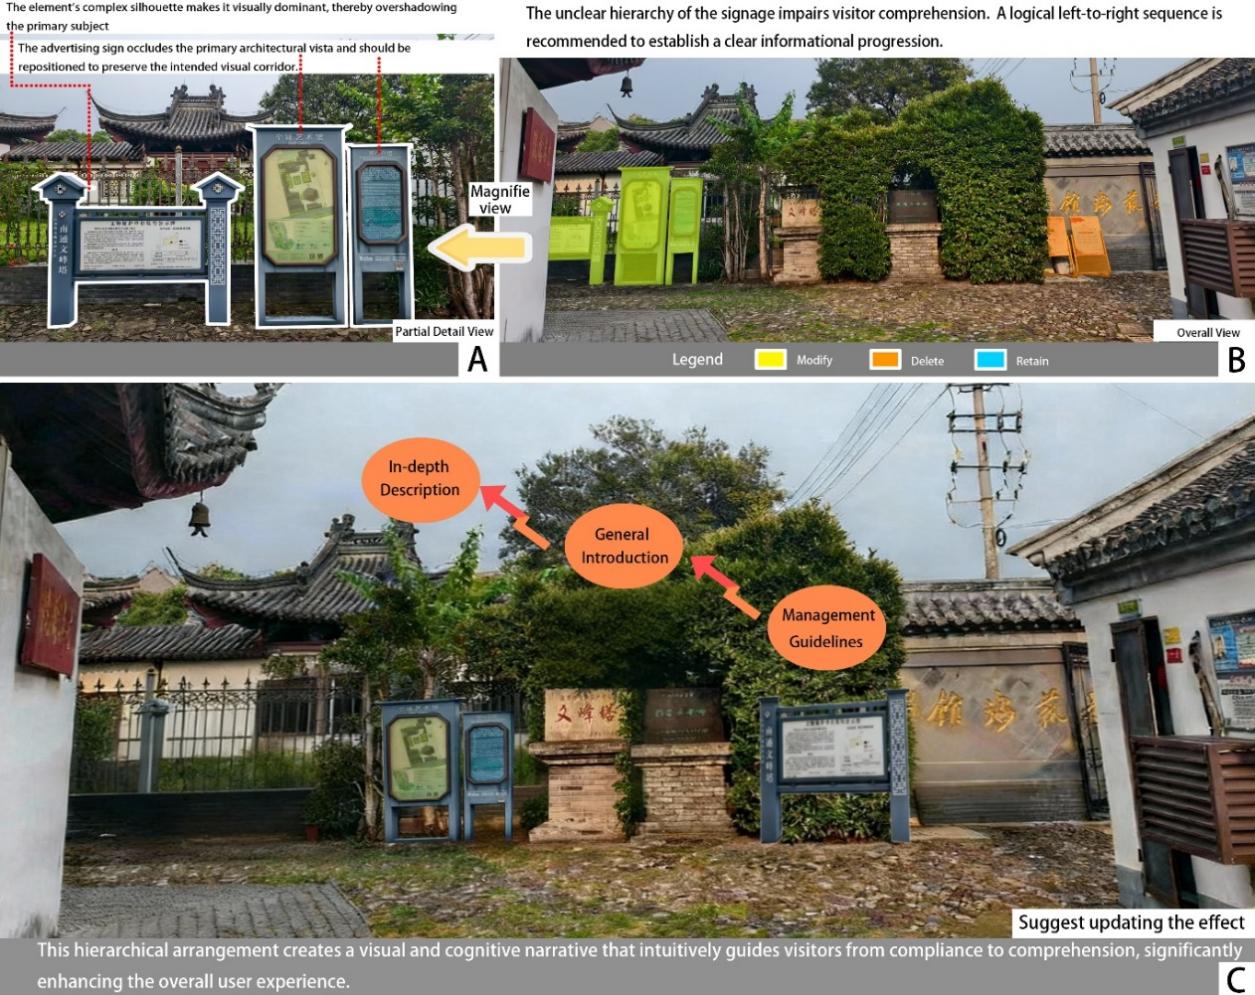


**Fig.A.7.** Analysis of the entrance signage at Wenfeng Pagoda in the Haohe Scenic Area (*A is the original image, B is the analysis image, C is the proposed effect image*.)

**Table A.3** Interview survey questions

| **Categories** | **Classification** | **Question Title** |
| --- | --- | --- |
| Attitudes towards visitor reviews: Q1-Q2  The relationship between Visual interference elements and visitors’ experience: Q3, Q4, Q7, Q8  Industry developments and issues: Q5, Q6 | Common questions | Q1: Do you pay attention to the visitor experience of classical gardens? Is the result satisfactory? |
| Q2: For gardens with rich historical and cultural heritage, what aspects of evaluations from visitors and online reviews do you most expect to receive? What aspects of negative reviews do you care about the most? |
| Q3: Currently, there are a large number of guide signs, commercial advertisements, and warning slogans in classical gardens. Have these elements had a significant impact on visitors' ways of visiting and experiencing? What are the main aspects most severely affected in your opinion? |
| Q4: Could you please elaborate on what the interference dimensions of these visual elements are? |
| Managers-only questions | Q5: What is your view on the necessity of setting up these elements? What role do they play in garden management? |
| Q6: As a manager, do you anticipate new changes or reforms in the presentation methods of these guide systems, warning slogans, and commercial advertisements in the next five years? |
| Designers-only questions | Q7: What do you think is the biggest difficulty in designing these elements? What are the design priorities? |
| Q8: As a designer, what aspects of feedback from visitors regarding the aforementioned visual interference elements do you most hope to receive? |

**Table A.4** Interview Table for Managers

| **Category** | **Summary of Responses** | **Consensus View** | **Individual View** |
| --- | --- | --- | --- |
| Common Questions | Q1: A1: Yes. But I feel the feedback obtained is rather limited.  A2: Yes. The quantity and quality of feedback need improvement.  A3: Same as above  Q2: A1: Expectation: Overall historical and cultural atmosphere.  Negative aspects: Whether commercial elements affect the experience.  A2: Expectation: Historical and cultural display methods.  Negative aspects: Whether the guide is clear.  A3: Expectation: Same as above.  Negative aspects: Whether there are potential safety hazards.  Q3: A1: Yes. The historical atmosphere is damaged.  A2: Yes. It distracts attention from scenery and culture.  A3: Yes. The overall impression is overly commercialized.  Q4: A1: Quantity, color, tone.  A2: Spatial shape, style.  A3: Information hierarchy, context. | Q1: Visitor experience surveys have been conducted, but they are incomplete.  Q2: Expect visitors’ evaluations related to the garden’s historical culture; care about negative reviews regarding commerce, guidance, and safety hazards.  Q3: These elements have a significant impact on visitor experience, affecting aspects like historical atmosphere and attention.  Q4: The interference dimensions of visual elements include quantity, color, shape, space, information hierarchy, and context. | Q1: Only focus on negative feedback comments.  Q2: Create a historical atmosphere.  Q3: Distracts attention, with slight impacts.  Q4: Aspects of quantity, volume, and spatial density distribution. |
| Manager-Exclusive Questions | Q5: A1: Necessary. It provides economic support.  A2: Necessary. It helps establish order.  A3: Necessary. It conveys cultural information.  Q6: A1: Yes. It will be intelligent and more concealed in form.  A2: Yes. It will be more aesthetic, unified in style, use eco-friendly materials, and have artistic modeling.  A3: Probably yes. Reduce quantity while improving quality, and implement precise delivery. | Q5: Guide signs, commercial advertisements, and warning slogans are necessary; they play roles in visiting, safety, and operation.  Q6: It is expected that the presentation methods of guide systems, commercial advertisements, and warning slogans will change—becoming more intelligent, and integrating culture and environmental protection. | Q1: None.  Q2: Focus on intellectualization. |

**Table A.5** Interview Table for Designers

| **Category** | **Summary of Responses** | **Consensus View** | **Individual View** |
| --- | --- | --- | --- |
| Common Questions | Q1: B1: Yes. Not satisfied; visitor experience needs improvement.  B2: Yes. Failed to meet expected results.  B3: Same as above  Q2: B1: Expectation: Integration degree of visual elements with historical culture.  Negative aspects: Inconsistent design of visual elements.  B2: Expectation: Whether visual elements conform to historical and cultural ambiance.  Negative aspects: Visual elements damage the aesthetic feeling of the garden.  B3: Expectation: Visual elements convey historical and cultural information.  Negative aspects: Visual interference experience.  Q3: B1: Yes. Immersive experience.  B2: Yes. Destroys the overall visual perception.  B3: Yes. Interferes with the effective transmission of cultural information.  Q4: B1: Quantity and volume.  B2: Color and tone.  B3: Information hierarchy, text tone. | Q1: Pay attention to visitor experience; the result is unsatisfactory.  Q2: Expect visitors’ evaluations on the integration of visual elements with historical culture; care about negative reviews related to visual element design, aesthetic feeling, and interference.  Q3: These elements have a significant impact on visitor experience, affecting immersive experience, visual aesthetic feeling, cultural understanding, etc.  Q4: The interference dimensions of visual elements include quantity, shape, space, information hierarchy, context, etc. | Q1: None.  Q2: Aspect of element design.  Q3: None.  Q4: Aspect related to color. |
| Designer-Exclusive Questions | Q7: B1: Difficulty: Meeting functional needs while highly aligning elements with the garden’s historical and cultural requirements.  Priority: Integrate visual elements into the garden and convey information clearly.  B2: Difficulty: Balancing design and management.  Priority: Spatial position and volume, coordination.  B3: Difficulty: Avoiding a sense of disharmony.  Priority: Enhance cultural connotation and artistic aesthetic feeling.  Q8: B1: Matching degree of shape and style, color coordination degree.  B2: Spatial layout, clarity of information transmission.  B3: Visual elements that cause specific interference experiences. | Q7: The biggest difficulty is aligning visual elements with the style of classical gardens, balancing function and style, etc.; design priorities include integrating elements into the garden, conveying information clearly, and controlling space coordination, etc.  Q8: Hope to receive visitors’ feedback on visual element modeling, color, spatial layout, information transmission, etc. | Q7: None.  Q8: None. |


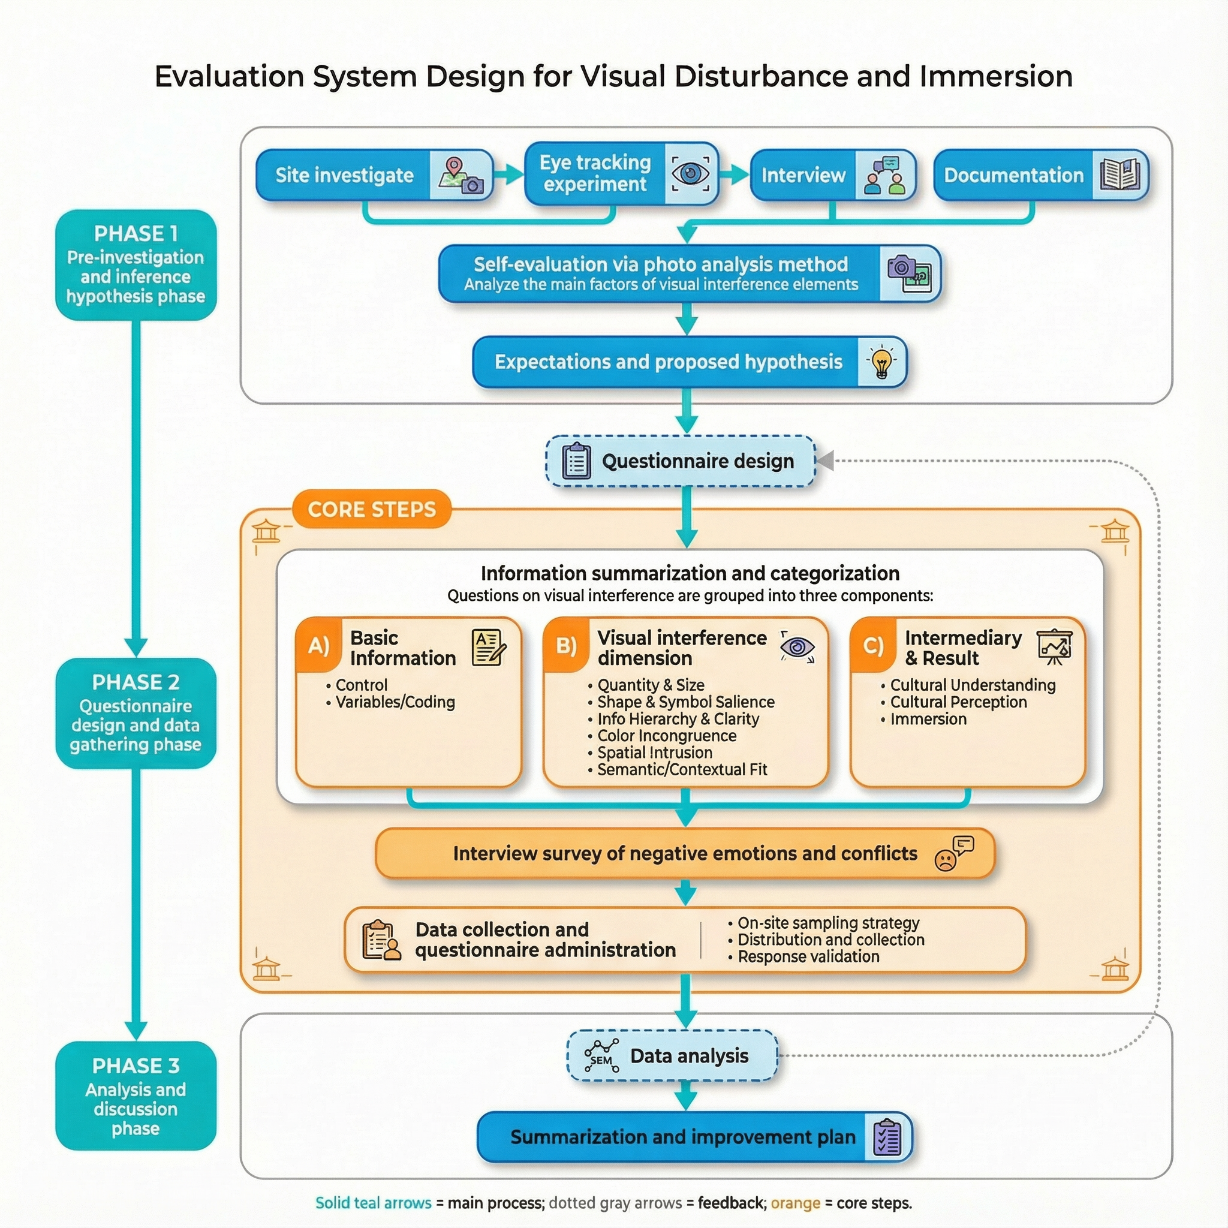


**Fig.A.8.** Framework and procedures of the evaluation system

**Table A.6** Questionnaire survey

| **Categories** | | **Question Title** |
| --- | --- | --- |
| Basic information of tourists: Q1-Q5 | | Q1: Is this your first visit to this heritage site? |
| Q2: How familiar are you with the history and culture of this heritage site? On a scale of 1 to 5, how would you rate your knowledge? |
| Q3: What is your main purpose for visiting today? (Multiple choices allowed) |
| Q4: How long do you plan to stay here? |
| Q5: Which specific site/location are you evaluating currently? |
| The impact of the six major factors of visual interference elements on cultural understanding and cultural perception: Q6-Q17 | Quantity/Scale | Q6: There are too many signs/panels unrelated to the culture here, which distract my attention. |
| Q7: Some signs/facilities are too large, obscuring key cultural information. |
| Shape/Symbol salience | Q8: The design of certain signs/installations is too eye-catching, interrupting the perception of the traditional landscape. |
| Q9: The style of the icons/graphics on site is inconsistent with traditional patterns, which breaks my immersion. |
| Information hierarchy/Priority | Q10: Directional, warning, and explanatory information are mixed together, making the hierarchy unclear. |
| Q11: The existing information is presented with clear hierarchy, helping me understand the key cultural points. |
| Color discordance | Q12: The colors of some signs/installations are too bright or reflective, disrupting the overall color tone. |
| Q13: These colors do not match my expectations of the traditional colors for this heritage site. |
| Spatial intrusion/Occlusion | Q14: Irrelevant elements appear within key sightlines/main axes/framed views, affecting appreciation. |
| Q15: These elements are too close to the core features or at an inappropriate height, causing obstruction. |
| Contextual consistency | Q16: The wording/translations/tone of the signage are not appropriate for the context, affecting my understanding of the historical information. |
| Q17: The cultural expression in the explanations and icons is appropriate and consistent with the site's character. |
| Tourists' evaluations of cultural understanding, cultural perception, and immersive experience: Q18-Q27 | Cultural understanding (CU) | Q18: I can accurately grasp the historical semantics and symbolic meanings presented here. |
| Q19: I can follow a clear narrative thread to understand the cultural theme of this landscape. |
| Q20: The on-site information does not cause me ambiguity or misinterpretation. |
| Cultural perception (CP) | Q21: I feel the cultural atmosphere is unified and internally consistent. |
| Q22: The spirit of the place / artistic conception is clearly expressed, making it easy for me to form an overall impression. |
| Q23: The visual language is harmonious with the environment, without a noticeable sense of incongruity. |
| Immersion (IM) | Q24: I remain focused during my viewing and am not easily interrupted. |
| Q25: I can easily imagine myself in the relevant historical context. |
| Q26: Modern functional elements do not significantly disrupt my sense of presence/immersion. |
| Q27: Overall, I feel engaged and willing to stay longer. |

**Table A.7**

Cronbach’s α reliability results for each dimension and the overall scale

| **Dimension** | **Scope of Questions** | **Cronbach’s α** |
| --- | --- | --- |
| Quantity/Scale | Q6–Q7 | 0.883 |
| Shape/Symbol salience | Q8–Q9 | 0.873 |
| Information hierarchy/Priority | Q10–Q11 | 0.920 |
| Color discordance | Q12–Q13 | 0.870 |
| Spatial intrusion/Occlusion | Q14–Q15 | 0.890 |
| Contextual consistency | Q16–Q17 | 0.936 |
| Cultural understanding (CU) | Q18–Q20 | 0.827 |
| Cultural perception (CP) | Q21–Q23 | 0.926 |
| Immersion (IM) | Q24–Q27 | 0.928 |
| Total Quantity Table | Q6–Q27 | 0.825 |

**Table A.8** KMO and Bartlett sphericity test results

| **Test indicator** | **Value** | **Criteria for judgment** | **Conclusion** |
| --- | --- | --- | --- |
| KMO | **0.929** | >0.90 excellent | The data is very suitable for factor analysis |
| Bartlett’s χ² | **6884.95** | p < 0.001 significant | Reject null hypothesis, suitable for factor analysis |
| df | **231** | — | — |
| p | **<0.001** | <0.05 significant | Confirm suitability for factor analysis |

**Table A.9** Preliminary results of the exploratory factor analysis (EFA)

| **Indicator** | **Value / Result** |
| --- | --- |
| Extraction method | PCA (principal component analysis) with Varimax rotation |
| Number of factors (Kaiser criterion) | **2** |
| Eigenvalues (first two) | **10.59; 4.59** |
| Variance explained | **Factor 1: 48.13%**; **Factor 2: 20.87%** |
| Cumulative variance explained (first two factors) | **69.00%** |
| Major loadings of Factor 1 | **Q6–Q17** (Visual disturbance items; **Q11 & Q17 are reverse-scored in the dataset**) |
| Major loadings of Factor 2 | **Q18–Q27** (Understanding, Perception, and Immersion items) |

**Table A.10** Results of the confirmatory factor analysis (CFA) measurement model

| **Latent factor** | **Observed variable** | **Standardized factor loading** | **t** | **CR** | **AVE** |
| --- | --- | --- | --- | --- | --- |
| Visual Disturbance (VD) | Q6 | 0.72 | 11.35 |  |  |
| Q7 | 0.75 | 12.02 |  |  |
| Q8 | 0.70 | 10.88 |  |  |
| Q9 | 0.73 | 11.45 |  |  |
| Q10 | 0.68 | 10.22 |  |  |
| Q11 (R) | 0.65 | 9.87 |  |  |
| Q12 | 0.74 | 11.92 |  |  |
| Q13 | 0.76 | 12.08 |  |  |
| Q14 | 0.71 | 11.02 |  |  |
| Q15 | 0.70 | 10.84 |  |  |
| Q16 | 0.73 | 11.37 |  |  |
| Q17 (R) | 0.69 | 10.75 | 0.93 | 0.58 |
| CU | Q18 | 0.78 | 12.55 |  |  |
| Q19 | 0.80 | 12.88 |  |  |
| Q20 | 0.77 | 12.23 | 0.88 | 0.61 |
| CP | Q21 | 0.82 | 13.40 |  |  |
| Q22 | 0.90 | 14.72 |  |  |
| Q23 | 0.85 | 13.96 | 0.92 | 0.73 |
| IM | Q24 | 0.84 | 13.75 |  |  |
| Q25 | 0.88 | 14.20 |  |  |
| Q26 | 0.86 | 13.88 |  |  |
| Q27 | 0.85 | 13.67 | 0.93 | 0.72 |

**Table A.11** Comparison of fit indices across different models

| **Model type** | **χ²** | **df** | **χ²/df** | **CFI** | **TLI** | **RMSEA** | **SRMR** |
| --- | --- | --- | --- | --- | --- | --- | --- |
| Direct-effect mode | 500.8 | 208 | 2.41 | 0.901 | 0.882 | 0.078 | 0.067 |
| Full mediation model | 480.3 | 199 | 2.41 | 0.923 | 0.910 | 0.062 | 0.053 |
| Partial mediation model | 478.0 | 198 | 2.38 | 0.934 | 0.921 | 0.059 | 0.050 |

**Table A.12**Theoretical findings, supporting data, and implications

| **Theoretical finding** | **Supporting data** | **Theoretical implication** |
| --- | --- | --- |
| Visual disturbance reduces cultural experience overall | VD → CP: β = −0.32 (p < 0.01) \nVD → CU: β = −0.25 (p < 0.01) | Visitors do not evaluate individual disturbance types separately but perceive an overall disruption of cultural atmosphere and narrative coherence. |
| Cultural perception and cultural understanding enhance immersion | CP → IM: β = 0.40 (p < 0.001) \nCU → IM: β = 0.30 (p < 0.001) | The formation of immersion relies on dual processing, involving both atmospheric perception and narrative understanding. |
| The direct effect of visual disturbance is limited | VD → IM: β = −0.15 (p < 0.05) | Although disturbance has a direct disruptive effect, most of the loss occurs through its erosion of the mediating processes. |
| The mediation effects are significantly established | Indirect effect: \nCP −0.13 (CI = [−0.21, −0.07]) \nCU −0.08 (CI = [−0.15, −0.03]) | The decline in immersion results from combined degradation across both cognitive and perceptual dimensions. |
| The overall effect is significantly negative | Total effect: \nβ = −0.36 (p < 0.001) | Visual impurities significantly weaken immersion, underscoring the need for visual environment management in heritage conservation and experience enhancement. |

**Table A.13** Descriptive statistics and correlations among core constructs

| **Variable** | **Mean** | **SD** | **1** | **2** | **3** | **4** |
| --- | --- | --- | --- | --- | --- | --- |
| 1. VD | 2.72 | 0.82 | 1.000 |  |  |  |
| 2. CU | 3.43 | 0.79 | -0.267*** | 1.000 |  |  |
| 3. CP | 3.44 | 0.91 | -0.396*** | 0.759*** | 1.000 |  |
| 4. IM | 3.40 | 0.88 | -0.401*** | 0.748*** | 0.846*** | 1.000 |
| Note: Pearson correlations. *** p < 0.001. | | | | | | |

**Table A.14** Scenario based differences across six scenarios

| **Scenario** | **n** | **VD** | **CU** | **CP** | **IM** |
| --- | --- | --- | --- | --- | --- |
| 1 | 42 | 2.08 ± 0.84 | 3.78 ± 0.88 | 4.04 ± 0.80 | 3.98 ± 0.76 |
| 2 | 37 | 2.82 ± 0.60 | 3.38 ± 0.75 | 3.47 ± 0.76 | 3.44 ± 0.73 |
| 3 | 38 | 3.02 ± 0.76 | 3.12 ± 0.68 | 3.12 ± 0.79 | 3.02 ± 0.75 |
| 4 | 42 | 2.37 ± 1.03 | 3.48 ± 0.87 | 3.56 ± 1.11 | 3.58 ± 1.11 |
| 5 | 83 | 2.80 ± 0.80 | 3.54 ± 0.82 | 3.44 ± 0.92 | 3.47 ± 0.87 |
| 6 | 83 | 2.97 ± 0.58 | 3.28 ± 0.63 | 3.20 ± 0.81 | 3.12 ± 0.75 |
| Note: One way ANOVA indicates significant between scenario differences for all constructs:  VD: F(5,319) = 10.87, p < 0.001, η² = 0.146; CU: F(5,319) = 4.00, p = 0.002, η² = 0.059;  CP: F(5,319) = 6.32, p < 0.001, η² = 0.090; IM: F(5,319) = 8.04, p < 0.001, η² = 0.112. | | | | | |
